# Supplementary material for: Skeletal muscle-secreted DLPC orchestrates systemic energy homeostasis by enhancing adipose browning
Source: PubMed Central journal article supplement (PMC10689447; doi:10.1038/s41467-023-43402-z), 2023-11-30
Supplement: 41467_2023_43402_MOESM1_ESM.pdf [file 41467_2023_43402_MOESM1_ESM.pdf]

**Supplementary information for:**

**Skeletal muscle-secreted DLPC orchestrates systemic energy homeostasis by enhancing adipose browning**

Xiaodi Hu<sup>1,#</sup>, Mingwei Sun<sup>2,#</sup>, Qian Chen<sup>1</sup>, Yixia Zhao<sup>1</sup>, Na Liang<sup>1</sup>, Siyuan Wang<sup>3</sup>, Pengbin Yin<sup>4,5</sup>, Yuanping Yang<sup>2</sup>, Sin Man Lam<sup>6,7</sup>, Qianying Zhang<sup>1</sup>, Alimujiang Tuidiyusufu<sup>1</sup>, Yingying Gu<sup>1</sup>, Xin Wan<sup>1</sup>, Meihong Chen<sup>1</sup>, Hu Li<sup>2</sup>, Xiaofei Zhang<sup>2</sup>, Guanghou Shui<sup>6,7</sup>, Suneng Fu<sup>8</sup>, Licheng Zhang<sup>4,5</sup>, Peifu Tang<sup>4,5</sup>, Catherine C.L. Wong<sup>3</sup>, Yong Zhang<sup>1,2\*</sup>, Dahai Zhu<sup>1,2\*</sup>.

**The supplementary information includes: Supplementary Figure 1–12 and the figure legends**

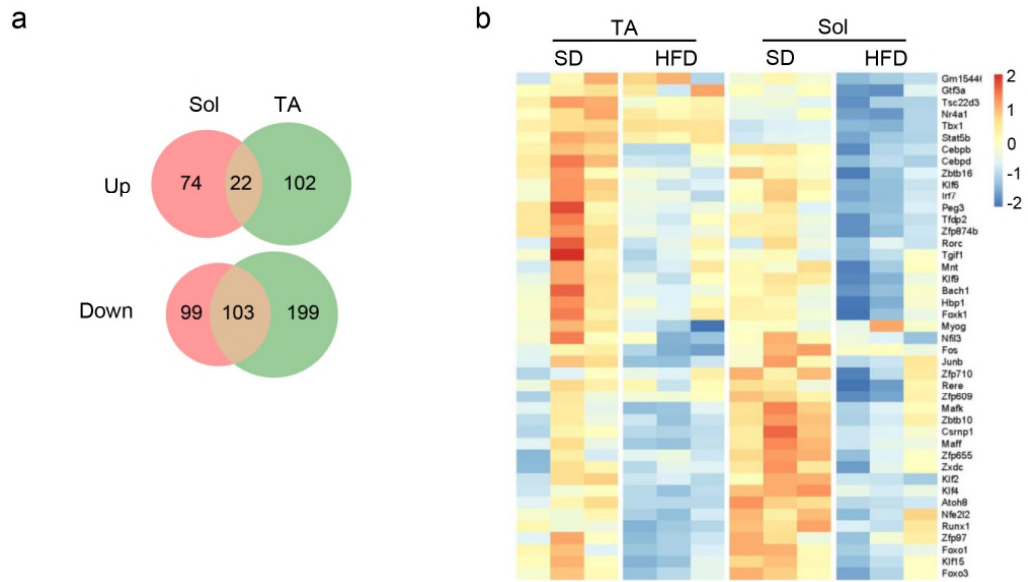

**Supplementary Fig. 1 *Myod* is upregulated in TA muscle, but not in Sol muscle, in response to HFD feeding**

**a** Venn diagram showing the numbers of upregulated (Up) and downregulated (Down) genes in TA and Sol muscles from HFD-fed mice compared to SD controls. **b** Heatmap showing the transcription factors (TFs) downregulated in TA and Sol muscles from HFD-fed mice compared to SD controls.

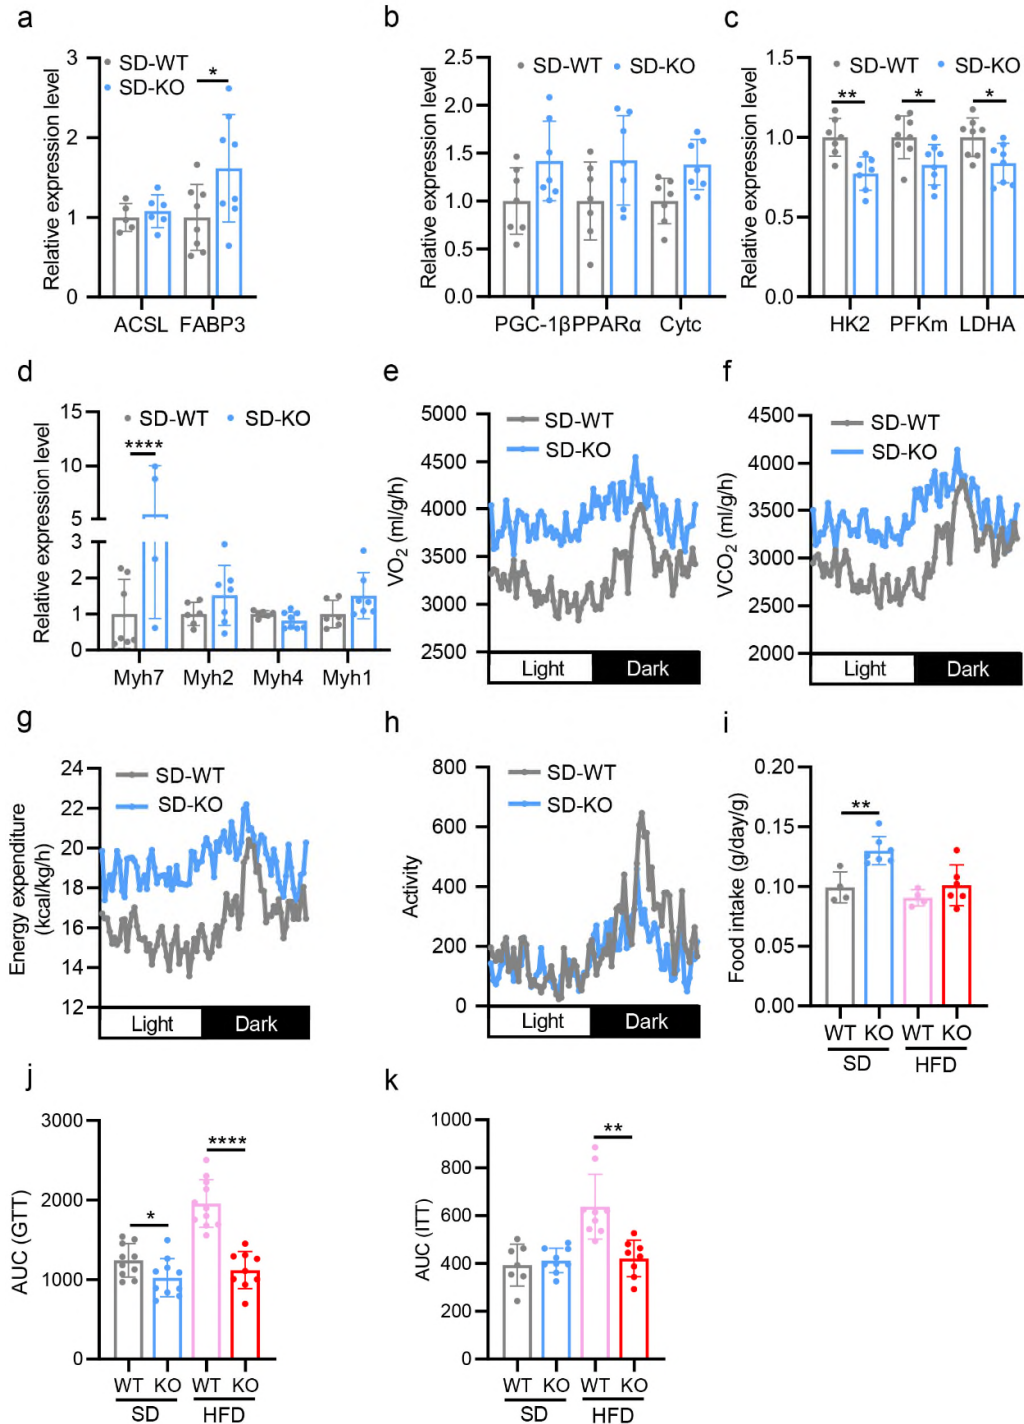

**Supplementary Fig. 2 *Myod* KO mice exhibit enhanced oxidative metabolism in skeletal muscle and resist HFD-induced obesity**

**a** Relative level of the mRNAs encoding long-chain acyl-CoA synthetase (*ACSL*) and fatty acid binding protein 3 (*FABP3*) in *quadriceps* (Qu) muscle of *Myod* KO mice and WT littermates fed with SD, determined by RT-qPCR. For *ACSL* gene,  $n = 5$  (SD-WT),  $n = 6$  (SD-KO); For

*FABP3* gene,  $n = 8$  (SD-WT),  $n = 8$  (SD-KO) mice.  $p = 0.0242$  (SD-WT vs. SD-KO). **b** Relative levels of the mRNAs encoding peroxisome proliferator-activated receptor gamma coactivator 1 beta (*PGC-1 $\beta$* ), peroxisome proliferator-activated receptor alpha (*PPAR $\alpha$* ), and cytochrome C (*CytC*) in Qu muscle of *Myod* KO mice and WT littermates fed with SD, as determined by RT-qPCR.  $n = 7$  mice. **c** Relative levels of genes encoding key enzymes for glycolysis in Qu muscle of *Myod* KO mice and WT littermates fed with SD, as determined by RT-qPCR. For *HK2* gene,  $n = 7$  (SD-WT),  $n = 8$  (SD-KO) mice.  $p = 0.0037$  (SD-WT vs. SD-KO); For *PFK $m$*  gene,  $n = 8$  (SD-WT),  $n = 8$  (SD-KO) mice.  $p = 0.0220$  (SD-WT vs. SD-KO); For *LDHA* gene,  $n = 8$  (SD-WT),  $n = 8$  (SD-KO) mice.  $p = 0.0333$  (SD-WT vs. SD-KO). *HK2*, hexokinase 2. *PFK $m$* , phosphofructokinase. *LDHA*, lactate dehydrogenase A. **d** Relative levels of genes encoding versions of fiber type-specific myosin-heavy chain (MHC), including *Myh7* (encoding MHC-I), *Myh2* (encoding MHC-IIa), *Myh1* (encoding MHC-IIx), and *Myh4* (encoding MHC-IIb), in Qu muscle of *Myod* KO mice and WT littermates fed with SD, as determined by RT-qPCR. For *Myh7* gene,  $n = 7$  (SD-WT),  $n = 4$  (SD-KO) mice.  $p < 0.0001$  (SD-WT vs. SD-KO); For *Myh2* gene,  $n = 6$  (SD-WT),  $n = 7$  (SD-KO) mice; For *Myh4* gene,  $n = 6$  (SD-WT),  $n = 8$  (SD-KO) mice; For *Myh1* gene,  $n = 6$  (SD-WT),  $n = 7$  (SD-KO) mice. **e** O<sub>2</sub> consumption by *Myod* KO mice and WT littermates fed with SD, as determined by metabolic chamber analysis,  $n = 4$  mice. **f** CO<sub>2</sub> production by *Myod* KO mice and WT littermates fed with SD, as determined by metabolic chamber analysis,  $n = 4$  mice. **g** Energy expenditure by *Myod* KO mice and WT littermates fed with SD, as determined by metabolic chamber analysis,  $n = 4$  mice. **h** Locomotor activities of *Myod* KO mice and WT littermates fed with SD, as determined by metabolic chamber analysis,  $n = 4$  mice. **i** Food intake by *Myod* KO mice and WT littermates fed with HFD or SD,  $n = 4$  (SD-WT),  $n = 7$  (SD-KO),  $n = 4$  (HFD-WT),  $n = 6$  (HFD-KO) mice.  $p = 0.0041$  (SD-WT vs. SD-KO). **j** Quantification of the area under the curve (AUC) from the GTT shown in Fig. 2h.  $n = 10$  (SD-WT),  $n = 10$  (SD-KO),  $n = 11$  (HFD-WT),  $n = 9$  (HFD-KO) mice.  $p = 0.0452$  (SD-WT vs. SD-KO),  $p < 0.0001$  (HFD-WT vs. HFD-KO). **k** Quantification of the area under the curve (AUC) from the ITT shown in Fig. 2i.  $n = 7$  (SD-WT),  $n = 9$  (SD-KO),  $n = 9$  (HFD-WT),  $n = 8$  (HFD-KO) mice.  $p = 0.0012$  (HFD-WT vs. HFD-KO). Data are presented as mean  $\pm$  SD. Significance was assessed by two-way ANOVA (a-d) or two tail Student's *t*-test (i-k). \* $p < 0.05$ , \*\* $p < 0.01$ , \*\*\*\* $p < 0.0001$  compared to WT control group.

Source data are provided as a Source Data file.

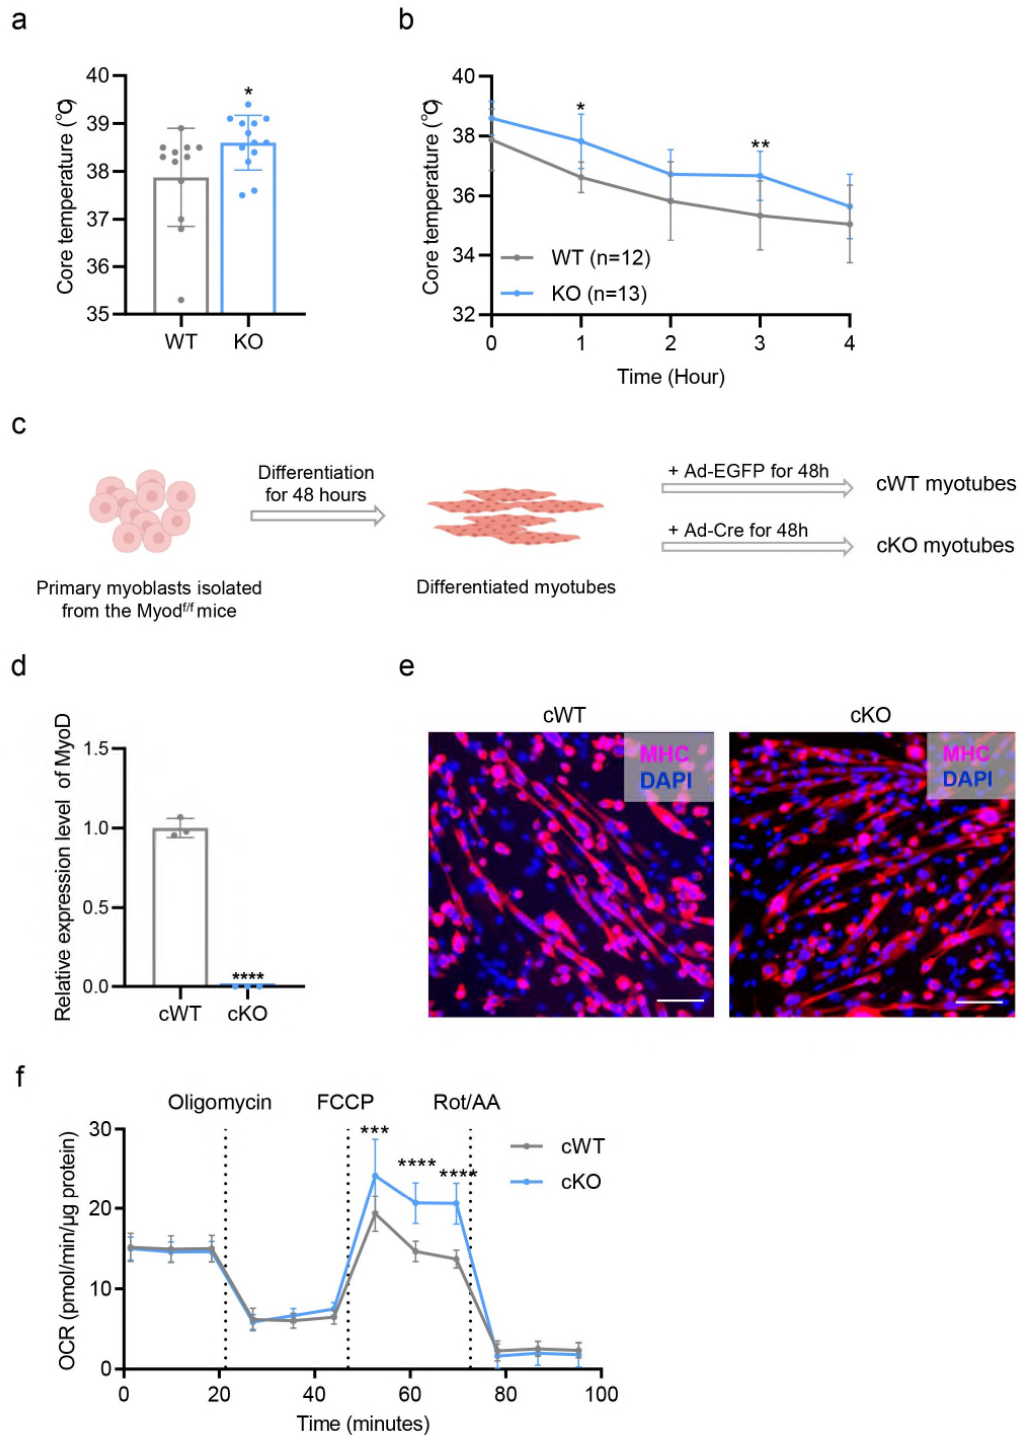

**Supplementary Fig. 3 Knockout of *Myod* might enhance mitochondrial respiration.**

**a** Core temperature in *Myod* KO mice (KO) and their WT controls at the thermal neutral conditions.  $n = 12$  mice (WT),  $n = 13$  mice (KO).  $p = 0.0373$ . **b** Core temperature in KO mice and their WT controls at 4°C for the indicated time points (0, 1, 2, 3, 4 h).  $n = 12$  mice (WT),  $n = 13$  mice (KO).  $n = 12$  mice (WT),  $n = 13$  mice (KO).  $p = 0.0145$  (1 h),  $p = 0.0048$  (3 h). **c**

Schematic diagram showing acute deletion of *Myod* in differentiated myotubes. The primary myoblasts isolated from the *Myod*<sup>f/f</sup> mice were induced to differentiation for 48 h and then infected with adenovirus expressing Cre (Ad-Cre) to achieve deletion of *Myod* (cKO), infection with the adenovirus expressing EGFP (Ad-EGFP) as controls (cWT). **d** Relative levels of *Myod* mRNA in cKO and cWT myotubes, as determined by RT-qPCR.  $p < 0.0001$ . Data are representative of three independent experiments. **e** Representative images showing immunostaining of myosin heavy chain (MHC) (red), a marker for the differentiated myotube, in cKO and cWT myotubes. DAPI (blue) served to visualize nuclei. Scale bar, 100  $\mu\text{m}$ . **f** Oxygen consumption rate (OCR), determined by Seahorse XFe24;  $p = 0.0007$  (52.63 min),  $p < 0.0001$  (61.13 min),  $p < 0.0001$  (69.63 min). Data are representative of three independent experiments. Data are presented as mean  $\pm$  SD. Significance was assessed by two-way ANOVA (b, f) or two tail Student's *t*-test (a, d). \* $p < 0.05$ , \*\* $p < 0.01$ , \*\*\* $p < 0.001$ , \*\*\*\* $p < 0.0001$  compared to WT or cWT control group. Source data are provided as a Source Data file.

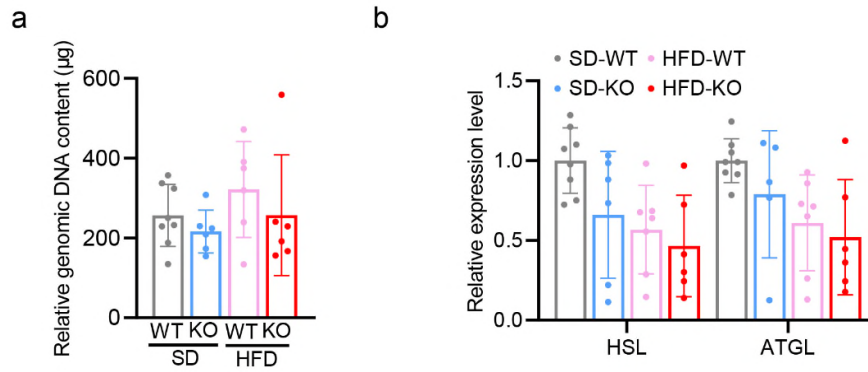

#### Supplementary Fig. 4 iWAT browning occurs in *Myod* KO mice

**a** Measurement of DNA contents in individual fat pads of iWAT from *Myod* KO mice and WT littermates fed with SD or HFD,  $n = 8$  (SD-WT),  $n = 6$  (SD-KO),  $n = 6$  (HFD-WT),  $n = 6$  (HFD-KO) mice. **b** Relative mRNA levels of lipolysis-related genes in iWAT from *Myod* KO mice and WT littermates fed with SD or HFD, as determined by RT-qPCR. For *HSL* gene,  $n = 8$  (SD-WT),  $n = 6$  (SD-KO),  $n = 7$  (HFD-WT),  $n = 6$  (HFD-KO) mice; For *ATGL* gene,  $n = 8$  (SD-WT),  $n = 5$  (SD-KO),  $n = 7$  (HFD-WT),  $n = 6$  (HFD-KO) mice. *HSL*, hormone-sensitive lipase. *ATGL*, adipose triglyceride lipase. Data are presented as mean  $\pm$  SD. Significance was assessed by two-way ANOVA (b) or two tail Student's *t*-test (a). Source data are provided as a Source Data file.



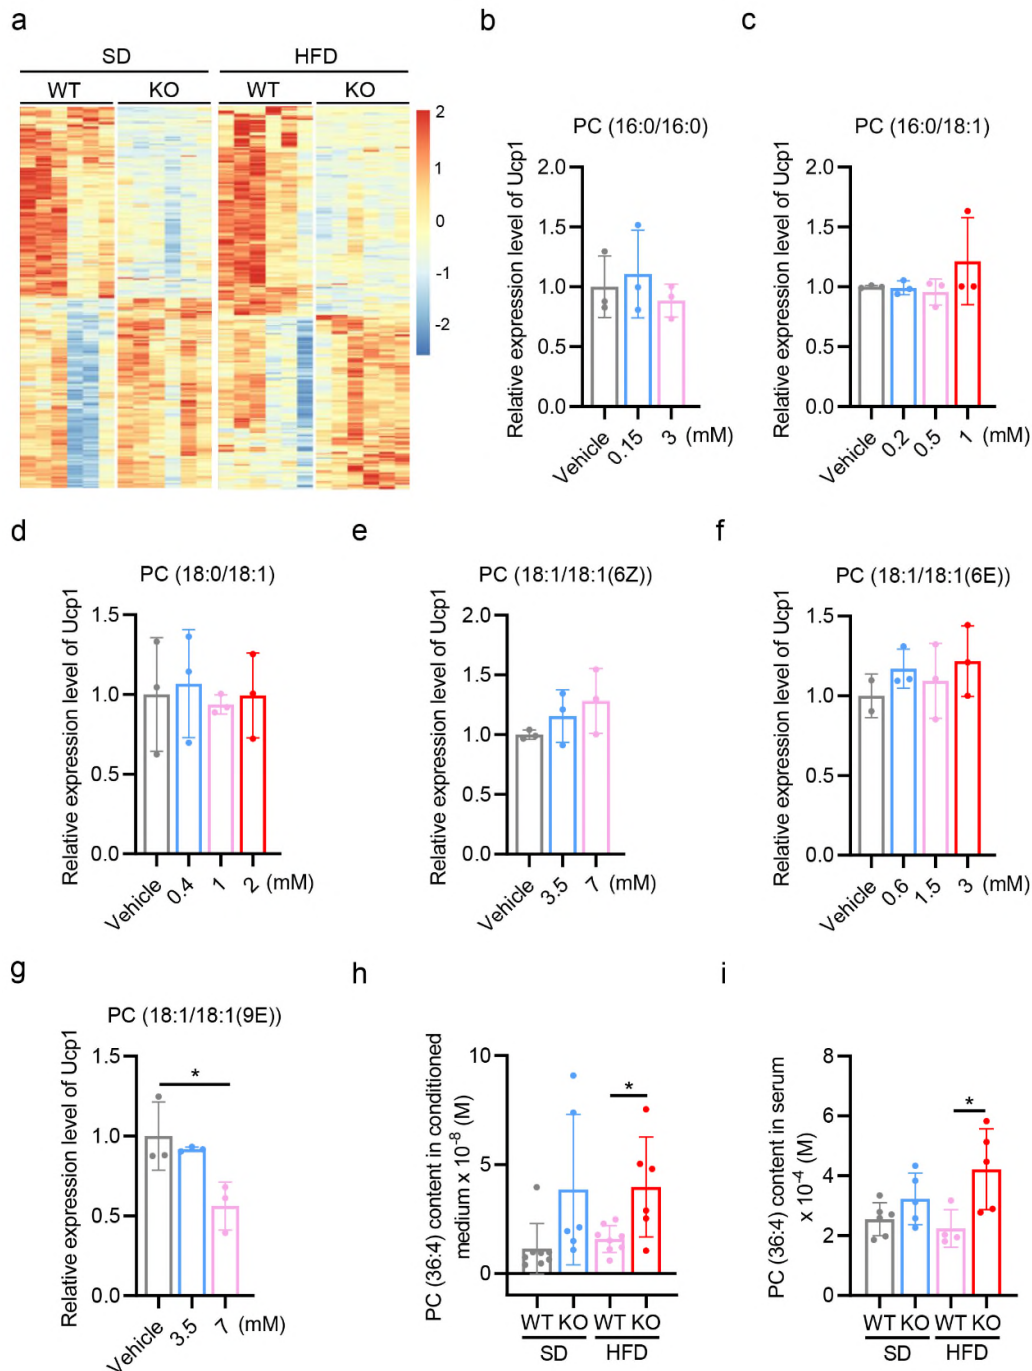

### Supplementary Fig. 5 DLPC induces iWAT browning in HFD-fed *Myod* KO mice

**a** Heatmap showing DEGs in TA and Sol muscles of *Myod* KO mice versus WT littermates fed with SD or HFD for 2 weeks, as described in Fig. 4a. **b-g** Relative mRNA levels of *Ucp1* in iWAT-derived primary adipocytes treated with vehicle or various doses of the indicated PC species for 12 h, as determined by RT-qPCR.  $p < 0.0210$  (Vehicle vs. 7mM PC (18:1/18:1(9E))). Data are representative of three independent experiments. **h** Levels of PC (36:4) in muscle-

derived CM from the mice described in (Fig. 4a); n = 8 (SD-WT), n= 6 (SD-KO), n= 8 (HFD-WT), n= 6 (HFD-KO) mice.  $p = 0.0148$  (HFD-WT vs. HFD-KO). **i** Levels of PC (36:4) in sera collected from the mice described in (Fig. 4a); n = 6 (SD-WT), n= 5 (SD-KO), n= 4 (HFD-WT), n= 5 (HFD-KO) mice.  $p = 0.0314$  (HFD-WT vs. HFD-KO). Data are presented as mean  $\pm$  SD. Significance was assessed by one-way ANOVA (b-g) or two tail Student's *t*-test (h-i). \* $p < 0.05$  compared to vehicle control group. Source data are provided as a Source Data file.

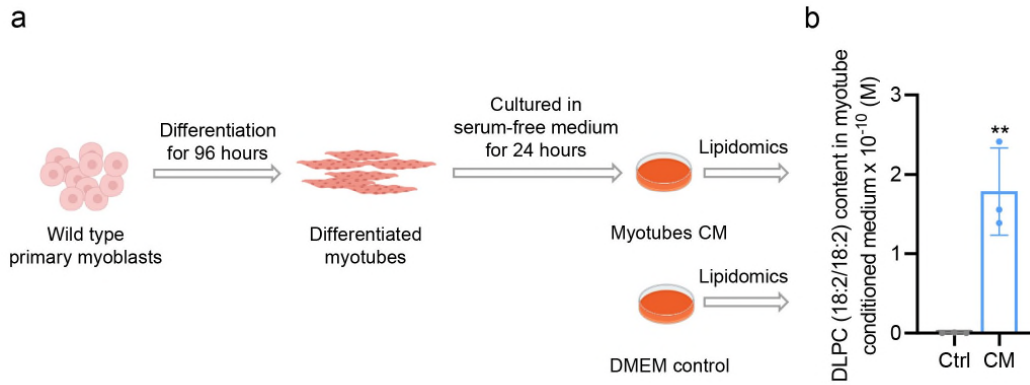

**Supplementary Fig. 6 DLPC is detected in the conditioned medium from the differentiated myotubes.**

a Experimental scheme for using lipidomics analyses to detect myotubes-secreted DLPC from conditioned medium (CM). b Levels of DLPC (18:2/ 18:2) in myotubes-derived CM.  $p = 0.0050$ . Data are representative of three independent experiments. Data are presented as mean  $\pm$  SD. Significance was assessed by two tail Student's  $t$ -test (b).  $**p < 0.01$ , compared to DMEM (Ctrl) control. Source data are provided as a Source Data file.

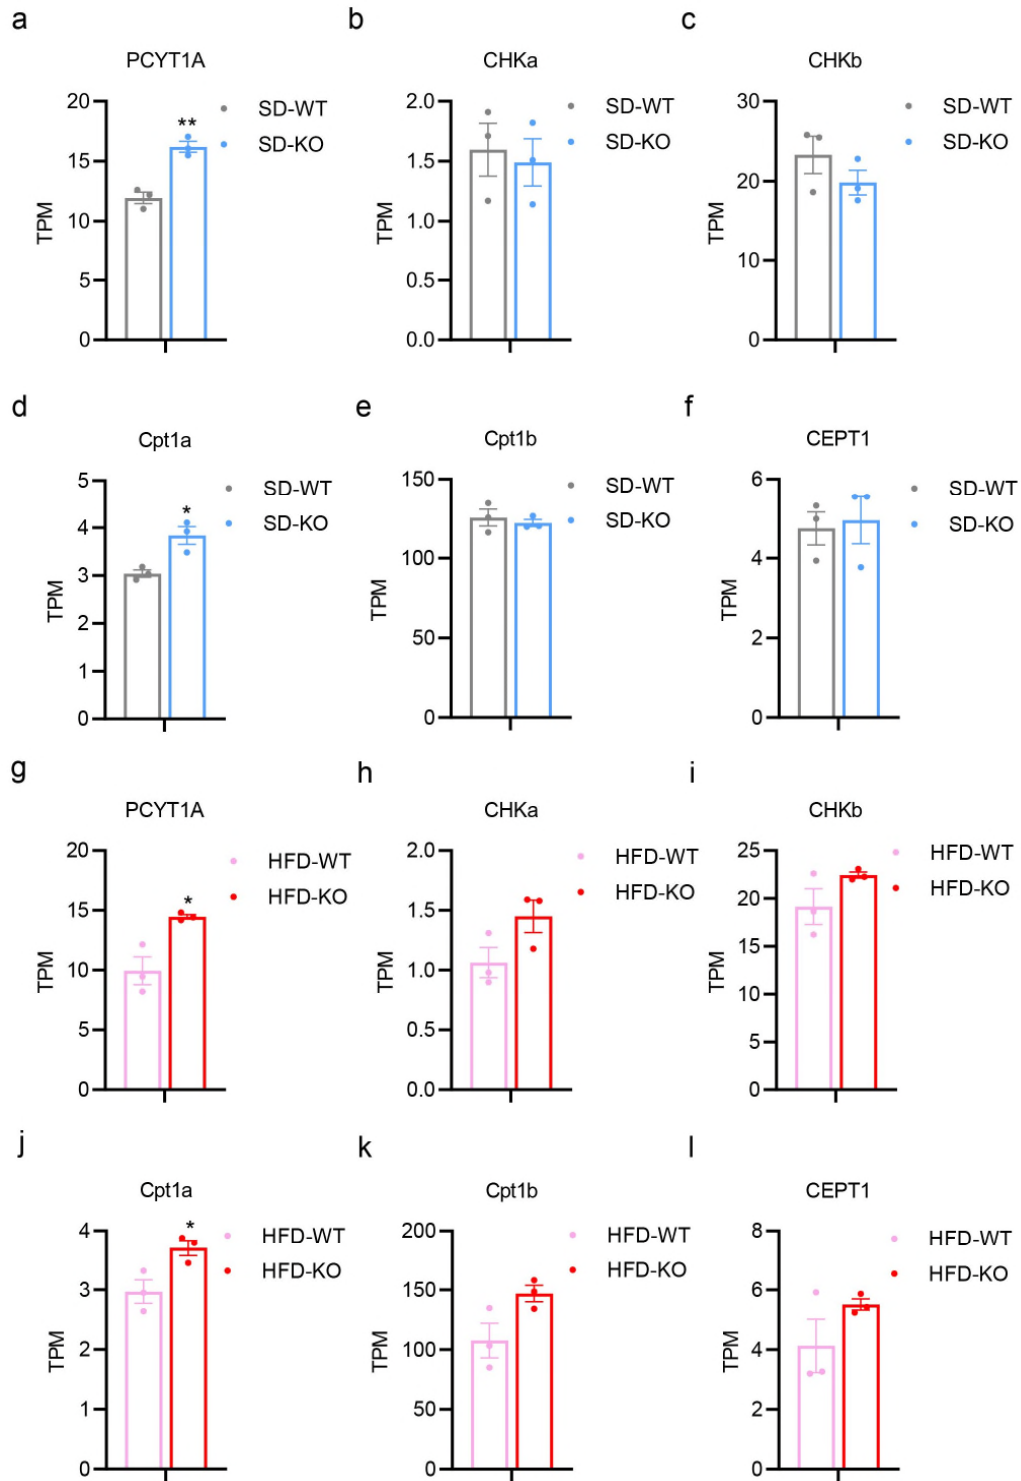

**Supplementary Fig. 7 Expression levels of the genes involved in the PC biosynthesis pathway in Soleus muscle of *Myod* KO mice**

a-l The data (TPM) were determined by RNA-seq. n = 3 mice.  $p = 0.0030$  (*PCYT1A*, SD-WT vs. SD-KO),  $p = 0.0170$  (*Cpt1a*, SD-WT vs. SD-KO),  $p = 0.0186$  (HFD-WT vs. HFD-KO),  $p$

= 0.0356 (HFD-WT vs. HFD-KO). Data are presented as mean  $\pm$  SD. Significance was assessed by two tail Student's *t*-test (a-l). \**p* < 0.05, \*\**p* < 0.01, compared to WT. Source data are provided as a Source Data file.

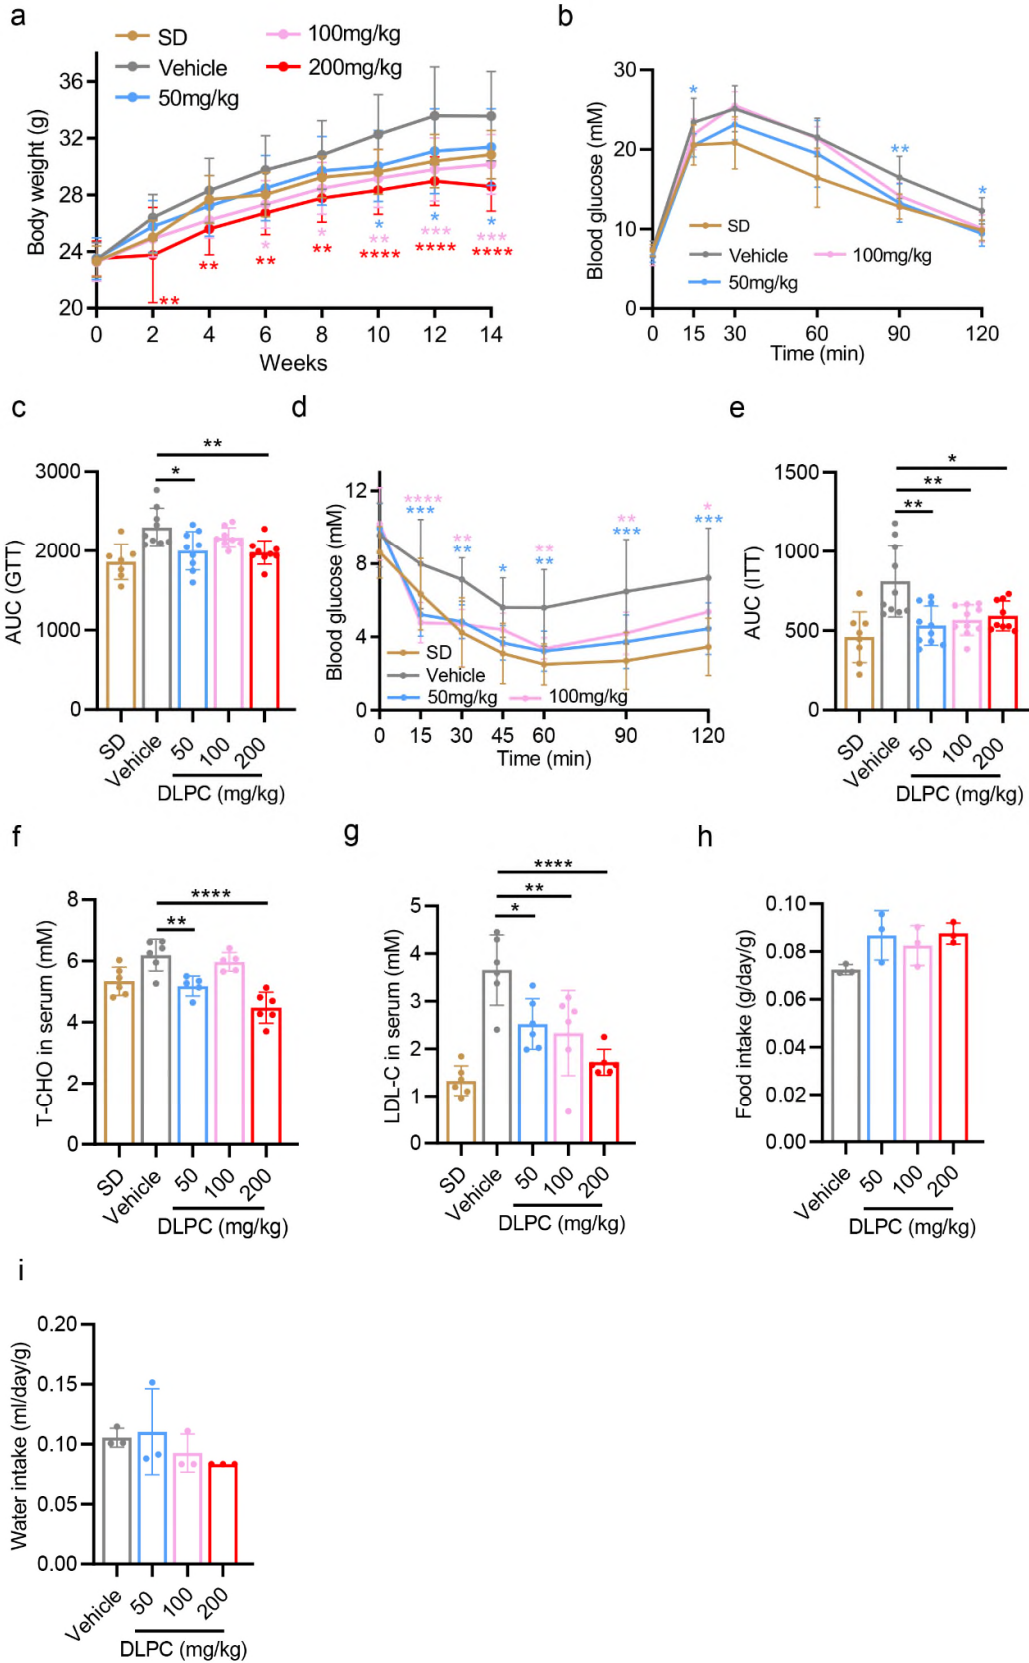

**Supplementary Fig. 8 DLPC prevents HFD-induced obesity**

**a** Body weights of mice that were fed with SD or HFD and simultaneously i.p. administered with vehicle or various doses of DLPC (50, 100, 200 mg/kg) daily for 14 weeks,  $n = 8$  (SD),  $n = 11$  (Vehicle),  $n = 11$  (50 mg/kg),  $n = 11$  (100 mg/kg),  $n = 12$  (200 mg/kg) mice. For Vehicle vs. 50mg/kg,  $p = 0.0437$  (10-week),  $p = 0.0186$  (12-week),  $p = 0.0499$  (14-week); For Vehicle vs. 100mg/kg,  $p = 0.0250$  (6-week),  $p = 0.0280$  (8-week),  $p = 0.0020$  (10-week),  $p = 0.0001$  (12-week),  $p = 0.0006$  (14-week); For Vehicle vs. 200mg/kg,  $p = 0.0091$  (2-week),  $p = 0.0076$  (4-week),  $p = 0.0021$  (6-week),  $p = 0.0019$  (8-week),  $p < 0.0001$  (10-week),  $p < 0.0001$  (12-week),  $p < 0.0001$  (14-week). **b** GTT performance of the mice described in (Fig. 5a);  $n = 7$  (SD),  $n = 9$  (Vehicle),  $n = 9$  (50 mg/kg),  $n = 8$  (100 mg/kg) mice. For Vehicle vs. 50mg/kg,  $p = 0.0185$  (15 min),  $p = 0.0072$  (90 min),  $p = 0.0202$  (120 min). **c** Quantification of the area under the curve (AUC) from the GTT shown in Fig. 5h and Supplementary Fig. 5b.  $n = 7$  (SD),  $n = 9$  (Vehicle),  $n = 9$  (50 mg/kg),  $n = 8$  (100 mg/kg),  $n = 9$  (200 mg/kg) mice.  $p = 0.0199$  (Vehicle vs. 50mg/kg),  $p = 0.0040$  (Vehicle vs. 200mg/kg). **d** ITT performance of the mice described in Fig. 5a.  $n = 8$  (SD),  $n = 10$  (Vehicle),  $n = 10$  (50 mg/kg),  $n = 10$  (100 mg/kg) mice. For Vehicle vs. 50mg/kg,  $p = 0.0005$  (15 min),  $p = 0.0049$  (30 min),  $p = 0.0230$  (45 min),  $p = 0.0038$  (60 min),  $p = 0.0006$  (90 min),  $p = 0.0005$  (120 min); For Vehicle vs. 100mg/kg,  $p < 0.0001$  (15 min),  $p = 0.0027$  (30 min),  $p = 0.0007$  (60 min),  $p = 0.0059$  (90 min),  $p = 0.0311$  (120 min). **e** Quantification of the area under the curve (AUC) from the ITT shown in Fig. 5i and Supplementary Fig. 5d.  $n = 8$  (SD),  $n = 10$  (Vehicle),  $n = 10$  (50 mg/kg),  $n = 10$  (100 mg/kg),  $n = 9$  (200 mg/kg) mice.  $p = 0.0029$  (Vehicle vs. 50mg/kg),  $p = 0.0054$  (Vehicle vs. 100mg/kg),  $p = 0.0152$  (Vehicle vs. 200mg/kg). **f** Total cholesterol (T-CHO) in sera from the mice described in (Fig. 5a);  $n = 6$  (SD),  $n = 6$  (Vehicle),  $n = 5$  (50 mg/kg),  $n = 5$  (100 mg/kg),  $n = 6$  (200 mg/kg) mice.  $p = 0.0038$  (Vehicle vs. 50mg/kg),  $p < 0.0001$  (Vehicle vs. 200mg/kg). **g** Low density lipoprotein cholesterol (LDL-C) in sera of the mice described in (Fig. 5a);  $n = 6$  mice.  $p = 0.0109$  (Vehicle vs. 50mg/kg),  $p = 0.0028$  (Vehicle vs. 100mg/kg),  $p < 0.0001$  (Vehicle vs. 200mg/kg). **h** Food intake by the mice described in (Fig. 5a),  $n = 3$  biologically independent experiments. **i** Water intake by the mice described in (Fig. 5a),  $n = 3$  biologically independent experiments. Data are presented as mean  $\pm$  SD. Significance was assessed by one-way ANOVA (f-i), two-way ANOVA (a-b, d), or two tail Student's *t*-test (c, e). \* $p < 0.05$ , \*\* $p < 0.01$ , \*\*\* $p < 0.001$ , \*\*\*\* $p < 0.0001$  compared to vehicle control group. Source data are provided as a Source

Data file.



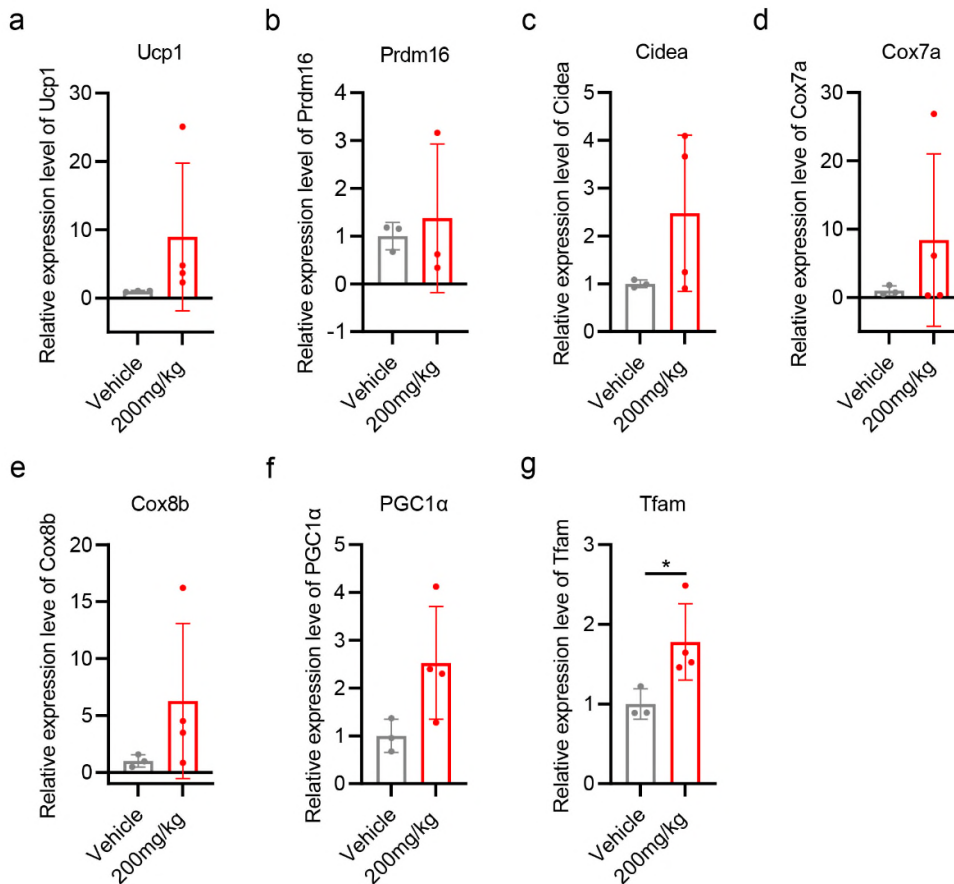

### Supplementary Fig. 9 DLPC prevents HFD-induced obesity

**a-g** Relative mRNA levels of browning-related genes in iWAT of the mice described in Fig. 5a, as determined by RT-qPCR. For *Ucp1* gene,  $n = 3$  (Vehicle),  $n = 4$  (200 mg/kg) mice; For *Prdm16* gene,  $n = 3$  (Vehicle),  $n = 3$  (200 mg/kg) mice; For *Cidea* gene,  $n = 3$  (Vehicle),  $n = 4$  (200 mg/kg) mice; For *Cox7a* gene,  $n = 3$  (Vehicle),  $n = 4$  (200 mg/kg) mice; For *Cox8b* gene,  $n = 3$  (Vehicle),  $n = 4$  (200 mg/kg) mice; For *PGC1α* gene,  $n = 3$  (Vehicle),  $n = 4$  (200 mg/kg) mice; For *Tfam* gene,  $n = 3$  (Vehicle),  $n = 4$  (200 mg/kg) mice.  $p = 0.0471$  (Vehicle vs. 200mg/kg). Data are presented as mean  $\pm$  SD. Significance was assessed by two tail Student's  $t$ -test (a-g). \* $p < 0.05$  compared to vehicle control group. Source data are provided as a Source Data file.

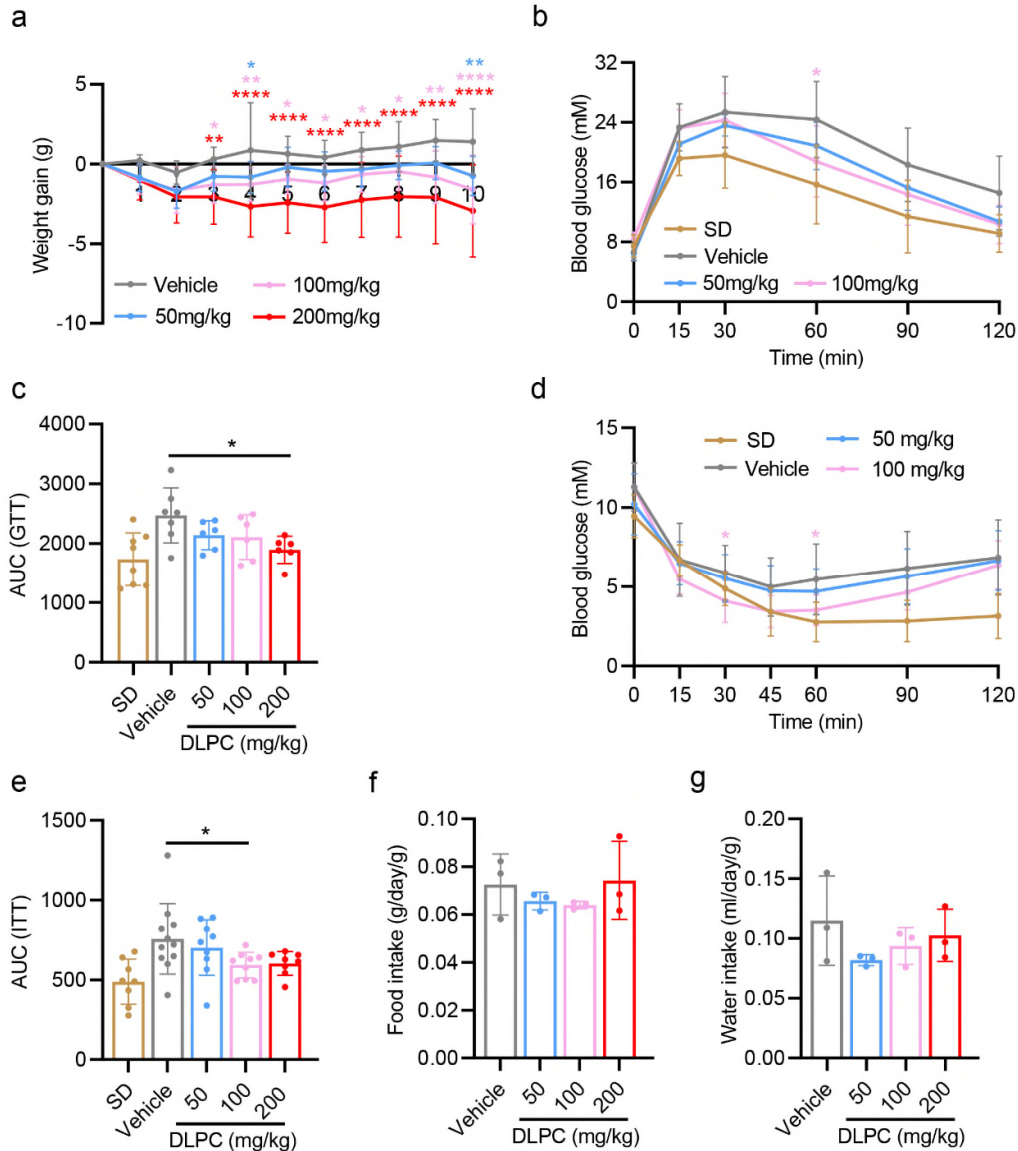

**Supplementary Fig. 10 DLPC treats obesity in DIO mice**

**a** Weight gain of DIO mice that were i.p. administered with vehicle or various doses of DLPC (50, 100, 200 mg/kg) daily for 10 weeks.  $n = 10$  (Vehicle),  $n = 10$  (50 mg/kg),  $n = 12$  (100 mg/kg),  $n = 10$  (200 mg/kg) mice. For Vehicle vs. 50mg/kg,  $p = 0.0313$  (4-week),  $p = 0.0039$  (10-week); For Vehicle vs. 100mg/kg,  $p = 0.0314$  (3-week),  $p = 0.0023$  (4-week),  $p = 0.0342$  (5-week),  $p = 0.0337$  (6-week),  $p = 0.0456$  (7-week),  $p = 0.0380$  (8-week),  $p = 0.0010$  (9-week),  $p < 0.0001$  (10-week); For Vehicle vs. 200mg/kg,  $p = 0.0011$  (3-week),  $p < 0.0001$  (4-week),  $p < 0.0001$  (5-week),  $p < 0.0001$  (6-week),  $p < 0.0001$  (7-week),  $p < 0.0001$  (8-week),  $p < 0.0001$  (9-week),  $p < 0.0001$  (10-week). Mice treated with vehicle served as controls. **b** GTT performance of the mice described in Fig. 6a.  $n = 8$  (SD),  $n = 7$  (Vehicle),  $n = 6$  (50 mg/kg),  $n$

= 6 (100 mg/kg) mice. For Vehicle vs. 100mg/kg,  $p = 0.0134$  (60 min). **c** Quantification of the area under the curve (AUC) from the GTT shown in Fig. 6d and Supplementary Fig. 7b.  $n = 8$  (SD),  $n = 7$  (Vehicle),  $n = 6$  (50 mg/kg),  $n = 6$  (100 mg/kg),  $n = 6$  (200 mg/kg) mice.  $p = 0.0182$  (Vehicle vs. 200mg/kg) **d** ITT performance of the mice described in Fig. 6a.  $n = 8$  (SD),  $n = 11$  (Vehicle),  $n = 9$  (50 mg/kg),  $n = 9$  (100 mg/kg) mice. For Vehicle vs. 100mg/kg,  $p = 0.0461$  (30 min),  $p = 0.0241$  (60 min). **e** Quantification of the area under the curve (AUC) from the ITT shown in Fig. 6e and Supplementary Fig. 7d.  $n = 8$  (SD),  $n = 11$  (Vehicle),  $n = 9$  (50 mg/kg),  $n = 9$  (100 mg/kg),  $n = 8$  (200 mg/kg) mice.  $p = 0.0480$  (Vehicle vs. 100mg/kg). **f** Food intake by the mice described in Fig. 6a,  $n = 3$  biologically independent experiments. **g** Water intake by the mice described in Fig. 6a,  $n = 3$  biologically independent experiments. Data are presented as mean  $\pm$  SD. Significance was assessed by one-way ANOVA (f-g), two-way ANOVA (a, b, d), or two tail Student's *t*-test (c, e). \* $p < 0.05$ , \*\* $p < 0.01$ , \*\*\* $p < 0.001$ , \*\*\*\* $p < 0.0001$  compared to vehicle control group. Source data are provided as a Source Data file.

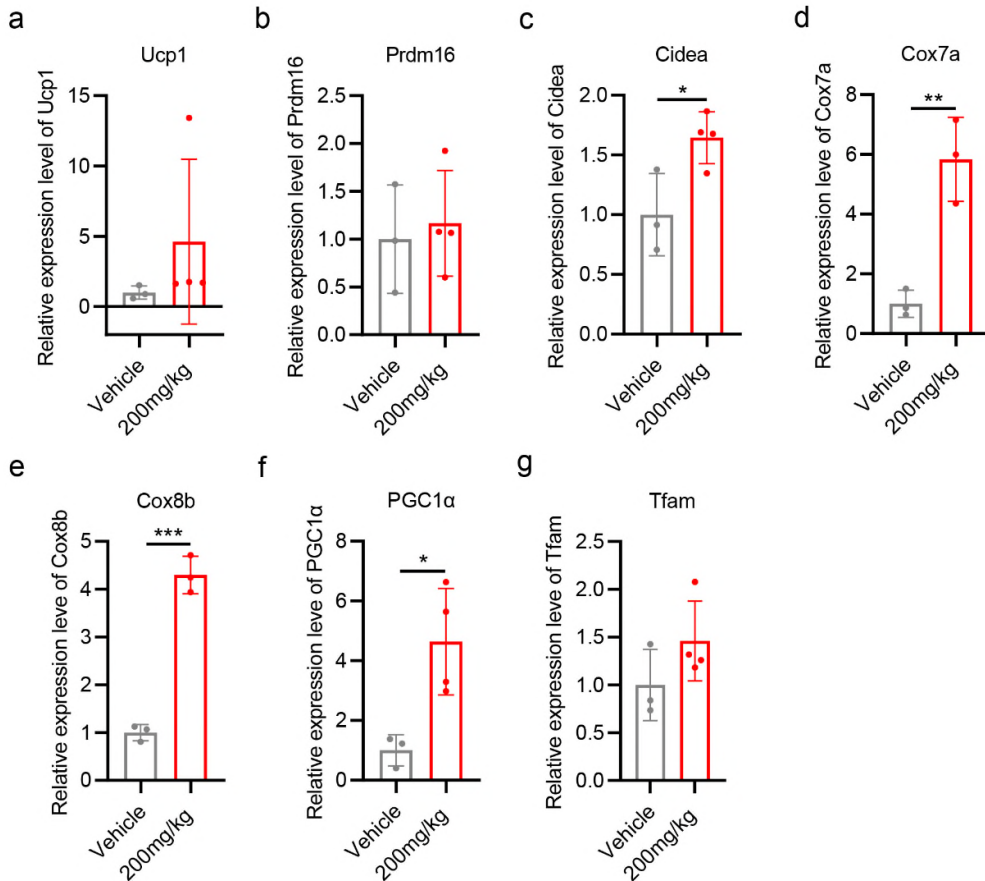

### Supplementary Fig. 11 DLPC treats obesity in DIO mice

**a-g** Relative mRNA levels of browning-related genes in iWAT tissues of the mice described in (Fig. 6a), as determined by RT-qPCR. For *Ucp1* gene,  $n = 3$  (Vehicle),  $n = 4$  (200 mg/kg) mice; For *Prdm16* gene,  $n = 3$  (Vehicle),  $n = 4$  (200 mg/kg) mice; For *Cidea* gene,  $n = 3$  (Vehicle),  $n = 4$  (200 mg/kg) mice,  $p = 0.0277$  (Vehicle vs. 200mg/kg); For *Cox7a* gene,  $n = 3$  (Vehicle),  $n = 3$  (200 mg/kg) mice,  $p = 0.0048$  (Vehicle vs. 200mg/kg); For *Cox8b* gene,  $n = 3$  (Vehicle),  $n = 3$  (200 mg/kg) mice,  $p = 0.0002$  (Vehicle vs. 200mg/kg); For *PGC1α* gene,  $n = 3$  (Vehicle),  $n = 4$  (200 mg/kg) mice,  $p = 0.0204$  (Vehicle vs. 200mg/kg); For *Tfam* gene,  $n = 3$  (Vehicle),  $n = 4$  (200 mg/kg) mice. Data are presented as mean  $\pm$  SD. Significance was assessed by two tail Student's *t*-test (a-g). \* $p < 0.05$ , \*\* $p < 0.01$ , \*\*\* $p < 0.001$  compared to vehicle control group. Source data are provided as a Source Data file.

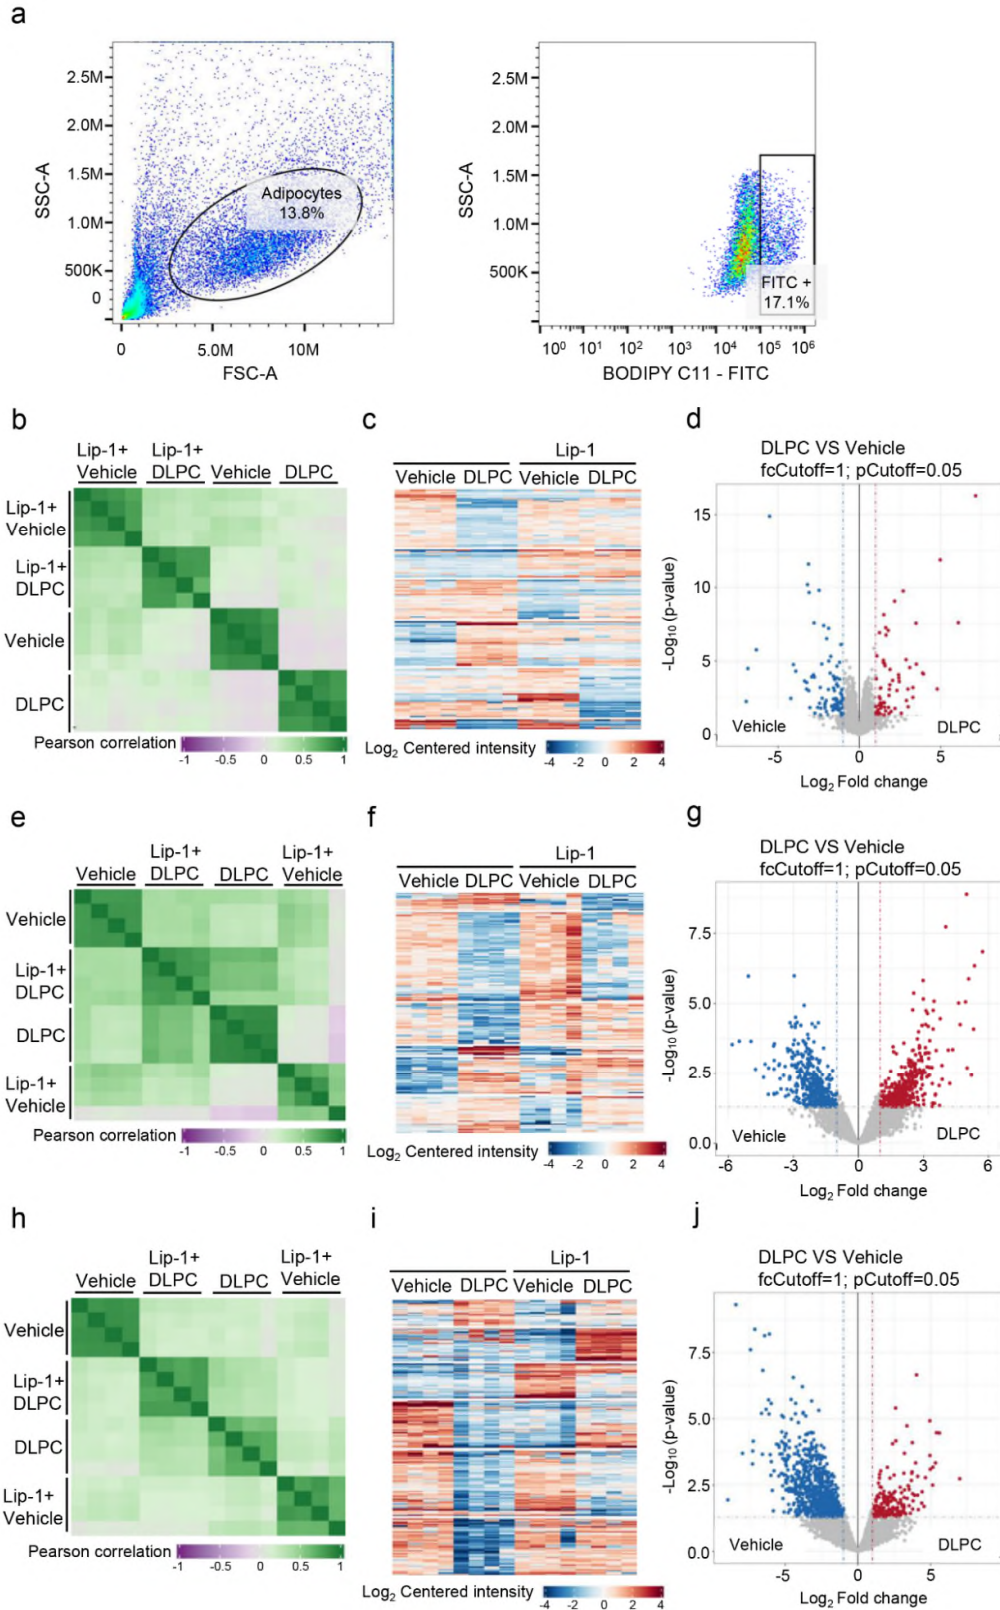

**Supplementary Fig. 12 DLPC induces iWAT browning via lipid peroxidation-mediated p38 activation**

**a** Gating strategy used for FACS sorting of BODIPY C11 positive cells. **b** Pearson correlation matrix of quantitative proteomics data. **c** Heatmap showing proteins that were differentially expressed between DLPC-treated and vehicle control adipocytes in the absence of Lip-1, as determined by proteomics analysis. **d** Volcano plot showing proteins that were differentially expressed between DLPC-treated and vehicle control adipocytes in the absence of Lip-1, as determined by proteomics analysis. **e** Pearson correlation matrix of quantitative redox proteomics data. **f** Heatmap showing proteins that were differentially expressed between DLPC-treated and vehicle control adipocytes in the absence of Lip-1, as determined by redox proteomics analysis. **g** Volcano plot showing the differentially oxidized proteins between DLPC-treated and vehicle control adipocytes in the absence of Lip-1, as determined by redox proteomics analysis. **h** Pearson correlation matrix of quantitative phospho-proteomics data. **i** Heatmap showing proteins that were differentially expressed between DLPC-treated and vehicle control adipocytes in the absence of Lip-1, as determined by phospho-proteomics analysis. **j** Volcano plot showing phospho-proteins that were differentially present between DLPC-treated and vehicle control adipocytes in the absence of Lip-1, as determined by phospho-proteomics analysis.
