# Supplementary material for: Skeletal muscle-secreted DLPC orchestrates systemic energy homeostasis by enhancing adipose browning
Source: PubMed Central journal article supplement (PMC10689447; doi:10.1038/s41467-023-43402-z), 2023-11-30
Supplement: 41467_2023_43402_MOESM3_ESM.pdf [file 41467_2023_43402_MOESM3_ESM.pdf]

## **Description of Additional Supplementary Files**

### **Supplementary Datasets**

**Supplementary Data 1.** Conditional medium metabolomics

**Supplementary Data 2.** Serum metabolomics

**Supplementary Data 3.** Conditional medium lipidomics

**Supplementary Data 4.** Serum lipidomics
